# Supplementary material for: QTL analysis of root morphology, flowering time, and yield reveals trade-offs in response to drought in Brassica napus
Source: PubMed Central journal article supplement (PMC4265167; doi:10.1093/jxb/eru423), 2014-11-04
Supplement: supp_eru423_jexbot128116_file001.pdf [file supp_eru423_jexbot128116_file001.pdf]

## Supplementary Material

QTL analysis of root morphology, flowering time and yield and their plasticity to drought in *Brassica napus*

Richard S. Fletcher, Jack L. Mullen, Annie Heiliger, John K. McKay

**Figure S1.** Genetic map of the SE-1 doubled haploid population

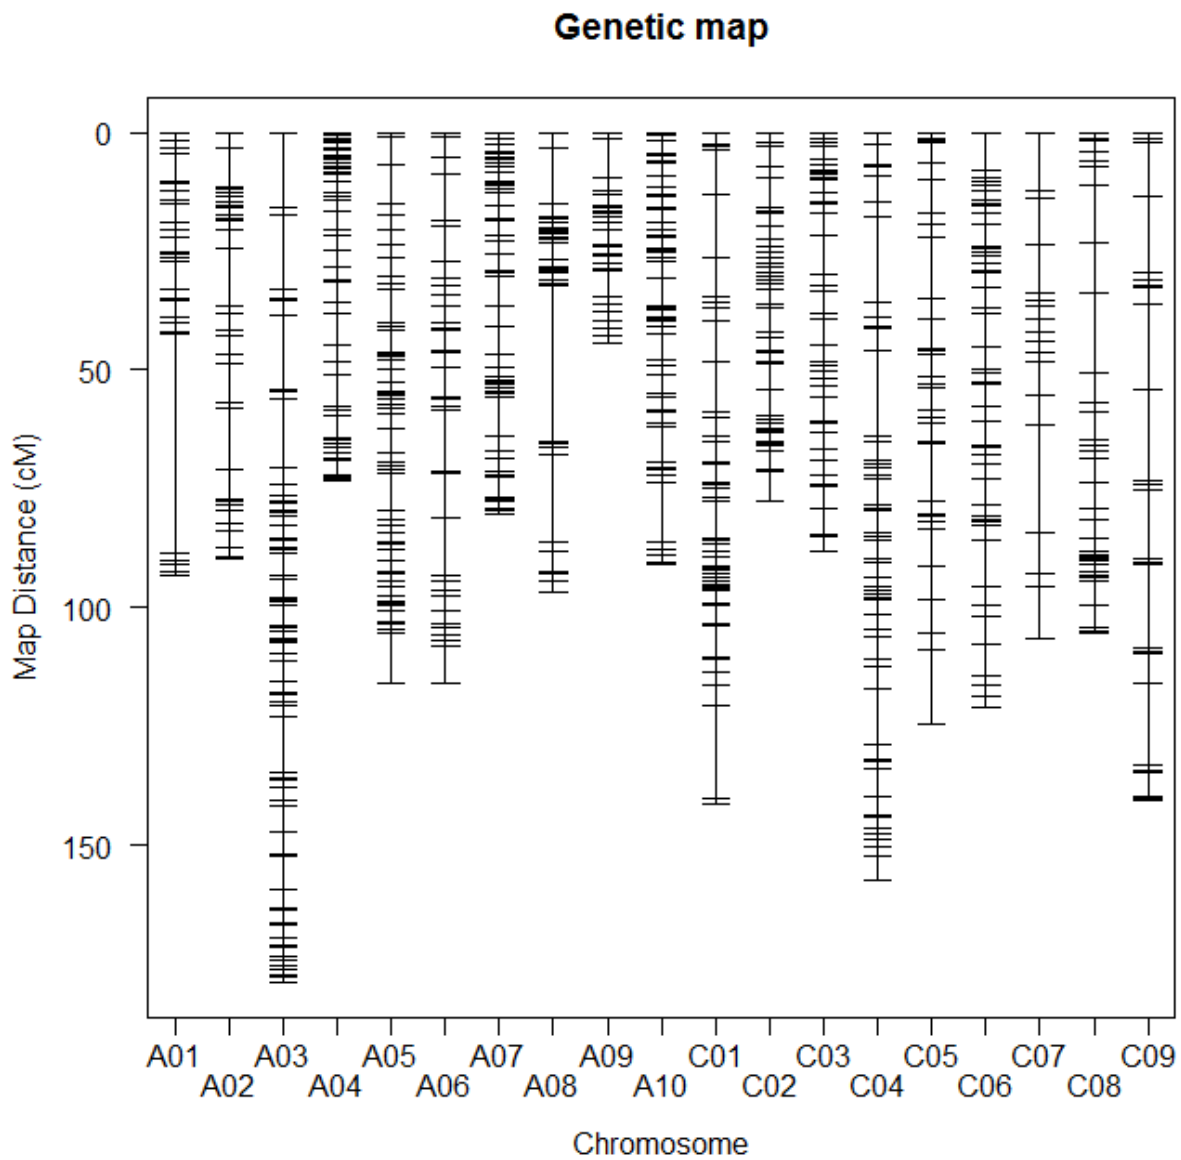

**Table S1.** ANOVA results for Days to Flower (DTF), Root Pulling Force (RPF), and Yield

|                 | DTF     |         | RPF     |         | Yield   |         |
|-----------------|---------|---------|---------|---------|---------|---------|
|                 | F-Value | P       | F-Value | P       | F-Value | P       |
| DH              | 31.3    | <0.0001 | 2.7     | <0.0001 | 2.4     | <0.0001 |
| Treatment       | 23.2    | <0.0001 | 40.8    | <0.0001 | 469.0   | <0.0001 |
| Treatment (Rep) | 17.9    | <0.0001 | 2.1     | 0.08    | 18.8    | <0.0001 |
| DH x Treatment  | 1.6     | <0.0001 | 1.0     | 0.33    | 1.5     | <0.0001 |

**Table S2.** Genetic and phenotypic correlations among traits measured in Fort Collins, CO in 2010. Genetic correlations are shown above the diagonal, while phenotypic correlations are below, population sizes used in estimating each correlation coefficient are in parentheses. All correlations are significant at  $P < 0.0001$

|                      | RPF <sub>dry</sub> | DTF <sub>dry</sub> | Yield <sub>dry</sub> | RPF <sub>wet</sub> | DTF <sub>wet</sub> | Yield <sub>wet</sub> |
|----------------------|--------------------|--------------------|----------------------|--------------------|--------------------|----------------------|
| RPF <sub>dry</sub>   |                    | 0.48<br>(n=195)    | -0.41<br>(n=225)     | 0.46<br>(n=225)    | 0.52<br>(n=225)    | -0.36<br>(n=225)     |
| DTF <sub>dry</sub>   | 0.31<br>(n=544)    |                    | -0.69<br>(n=195)     | 0.52<br>(n=195)    | 0.89<br>(n=195)    | -0.49<br>(n=195)     |
| Yield <sub>dry</sub> | -0.23<br>(n=650)   | -0.55<br>(n=544)   |                      | -0.45<br>(n=225)   | -0.68<br>(n=225)   | 0.52<br>(n=225)      |
| RPF <sub>wet</sub>   |                    |                    |                      |                    | 0.66<br>(n=225)    | -0.49<br>(n=225)     |
| DTF <sub>wet</sub>   |                    |                    |                      | 0.51<br>(n=643)    |                    | -0.61<br>(n=225)     |
| Yield <sub>wet</sub> |                    |                    |                      | -0.27<br>(n=651)   | -0.48<br>(n=643)   |                      |

**Table S3.** Summary of QTL identified with a genome-wide significance threshold of  $P \leq 0.05$  based on 1000 permutations

| Phenotype       | Treatment   | QTL              | Linkage Group | Position (cM) | LOD   | R <sup>2</sup> | Additive Effect (Wichita allele) |
|-----------------|-------------|------------------|---------------|---------------|-------|----------------|----------------------------------|
| DTF             | Wet         | <i>DTF.wet1</i>  | A02           | 15.4          | 4.01  | 2.21           | -1.41 ± 0.33                     |
|                 |             | <i>DTF.wet2</i>  | A03           | 102.0         | 8.11  | 4.67           | 2.04 ± 0.32                      |
|                 |             | <i>DTF.wet3</i>  | A10           | 75.0          | 37.69 | 30.05          | 5.10 ± 0.32                      |
|                 |             | <i>DTF.wet4</i>  | C02           | 65.0          | 41.43 | 34.50          | 5.48 ± 0.32                      |
|                 | Dry         | <i>DTF.dry1</i>  | A03           | 104.2         | 4.19  | 3.92           | 1.62 ± 0.37                      |
|                 |             | <i>DTF.dry2</i>  | A10           | 75.0          | 24.19 | 28.97          | 4.62 ± 0.38                      |
| <i>DTF.dry3</i> |             | C02              | 66.0          | 33.58         | 45.51 | 5.56 ± 0.37    |                                  |
| RPF             | Wet         | <i>RPF.wet1</i>  | A10           | 73.6          | 13.73 | 18.46          | 6.55 ± 0.80                      |
|                 |             | <i>RPF.wet2</i>  | C02           | 63.3          | 14.78 | 20.09          | 6.75 ± 0.80                      |
|                 |             | <i>RPF.wet3</i>  | C07           | 95.0          | 3.34  | 4.02           | 3.21 ± 0.85                      |
|                 | Dry         | <i>RPF.dry1</i>  | A10           | 76.0          | 12.15 | 19.71          | 5.32 ± 0.66                      |
|                 |             | <i>RPF.dry2</i>  | C02           | 63.3          | 7.22  | 11.12          | 3.92 ± 0.65                      |
| Yield           | Wet         | <i>Yld.wet1</i>  | A03           | 85.4          | 3.14  | 4.42           | -6.78 ± 1.77                     |
|                 |             | <i>Yld.wet2</i>  | A10           | 74.0          | 10.17 | 15.40          | -12.84 ± 1.80                    |
|                 |             | <i>Yld.wet3</i>  | C02           | 64.0          | 10.95 | 16.72          | -13.23 ± 1.78                    |
|                 | Dry         | <i>Yld.dry1</i>  | A03           | 141.7         | 3.12  | 3.82           | -1.52 ± 0.40                     |
|                 |             | <i>Yld.dry2</i>  | A10           | 78.0          | 15.57 | 21.73          | -3.84 ± 0.42                     |
|                 |             | <i>Yld.dry3</i>  | C02           | 66.0          | 12.98 | 17.62          | -3.24 ± 0.40                     |
|                 | Sensitivity | <i>YldSens.1</i> | A10           | 73.6          | 5.19  | 9.00           | -8.73 ± 1.75                     |
|                 |             | <i>YldSens.2</i> | C02           | 56.0          | 6.36  | 11.17          | -9.87 ± 1.78                     |

**Table S4.** Flowering time strata ranges and the number of lines included in each stratification class

| Strata | DTF Range  | # Lines |
|--------|------------|---------|
| 1      | 60.75-69.3 | 43      |
| 2      | 69.5-74    | 51      |
| 3      | 74.75-80.5 | 41      |
| 4      | 81-88.25   | 45      |
| 5      | 89-DNF     | 45      |
